# Supplementary material for: Reactions of ruthenium cyclopentadienyl precursor in the metal precursor pulse of Ru atomic layer deposition
Source: Royal Society of Chemistry journal article supplement (doi:10.1039/d0tc03910a), 2021-01-01
Supplement: d0tc03910a1.pdf [file d0tc03910a1.pdf]

# Reactions of Ruthenium Cyclopentadienyl Precursor in the Metal Precursor Pulse of Ru Atomic Layer Deposition

Ji Liu<sup>a</sup>, Hongliang Lu<sup>b</sup>, David Wei Zhang<sup>b</sup>, and Michael Nolan<sup>a,c\*</sup>

<sup>a</sup> Tyndall National Institute, University College Cork, Lee Maltings, Dyke Parade, Cork, T12 R5CP, Ireland

<sup>b</sup> State Key Laboratory of ASIC and System, Shanghai Institute of Intelligent Electronics & Systems, School of Microelectronics, Fudan University, Shanghai 200433, China

<sup>c</sup> Nanotechnology and Integrated Bioengineering Centre, Ulster University, Shore Road, Co Antrim, BT37 OQB, Northern Ireland

Corresponding author:

\*E-mail: Michael.nolan@tyndall.ie. Tel: +353 021 2346983

Table S1. The calculated reaction energy for hydrogen transfer step and reaction barriers on Ru (001) and (100) surfaces with  $\text{NH}_x$  terminations corresponding to zero-K condition. If the reaction energies of hydrogen transfer step are positive, the barriers are not calculated.

|         | $A: H^* + RuCp_2 \rightarrow RuCp^* + HCp$ |                                  |                      | $B: H^* + RuCp \rightarrow Ru^* + HCp$ |                                   |                      |
|---------|--------------------------------------------|----------------------------------|----------------------|----------------------------------------|-----------------------------------|----------------------|
|         | $E_{\text{adsorption}}$                    | $E_{\text{hydrogen}}^{\text{I}}$ | $E_{\text{barrier}}$ | $E_{\text{CpH}}^{\text{Des I}}$        | $E_{\text{hydrogen}}^{\text{II}}$ | $E_{\text{barrier}}$ |
| Ru(001) | -1.47                                      | -0.17                            | 1.33                 | -0.34                                  | -0.04                             | 0.98                 |
| Ru(100) | -0.62                                      | 0.48                             | 2.67                 | 3.20                                   | 2.46                              | Not calculated       |

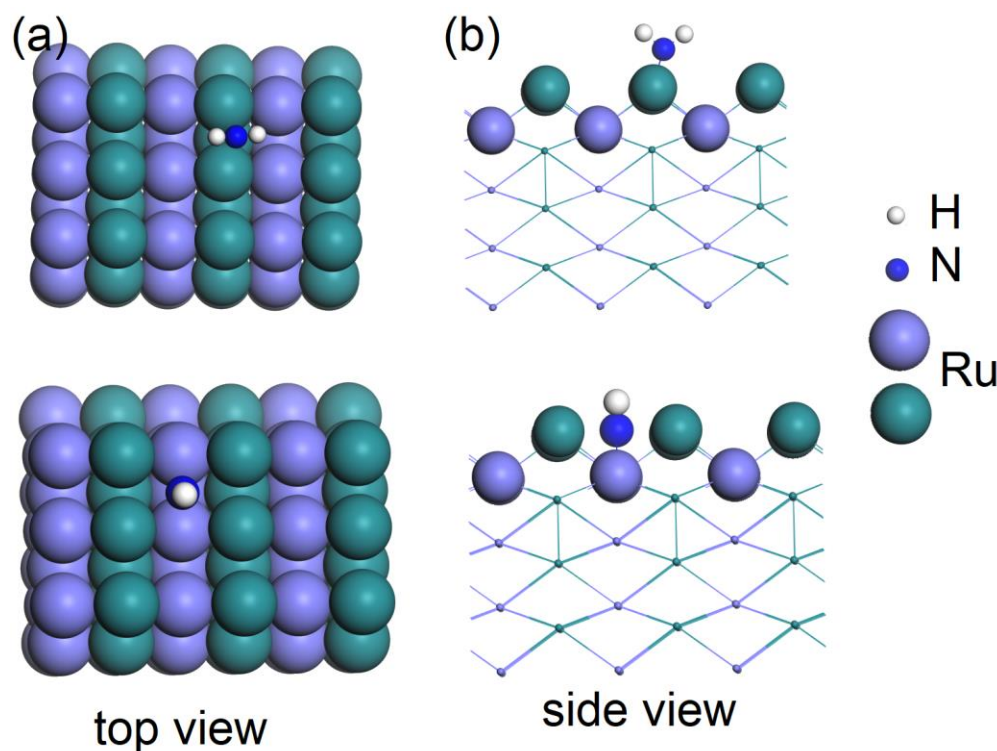

Figure S1. The configurations of the (a) top view and (b) side view of single  $\text{NH}$  and  $\text{NH}_2$  adsorbed on Ru(100) surface.  $\text{NH}$  prefers channel bridge and  $\text{NH}_2$  prefers surface bridge site.

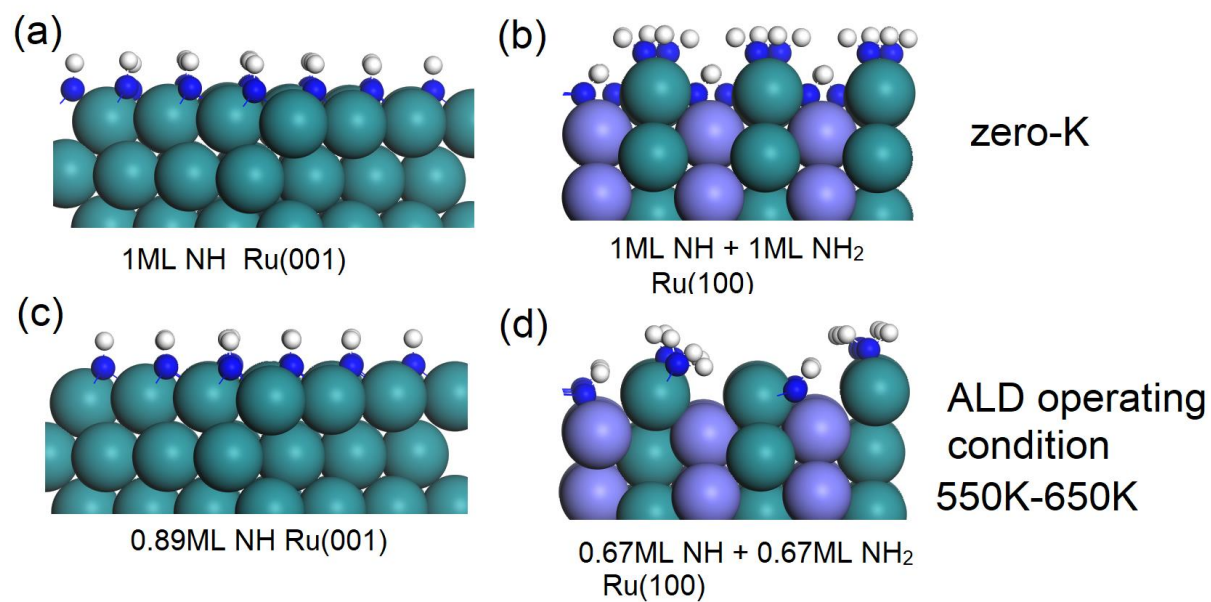

Figure S2. The side view of  $\text{NH}_x$ -terminated Ru surface at zero-K or high coverage condition including (a) Ru(001), and (b) Ru(100) and at ALD operating condition, with lower coverage including (c) Ru(001), and (d) Ru(100). Ru atoms are represented by green colour for surface terminating atoms and purple colour for the channel atoms in the (100) surface; N atom and H atom are represented by dark blue and white atom, respectively.

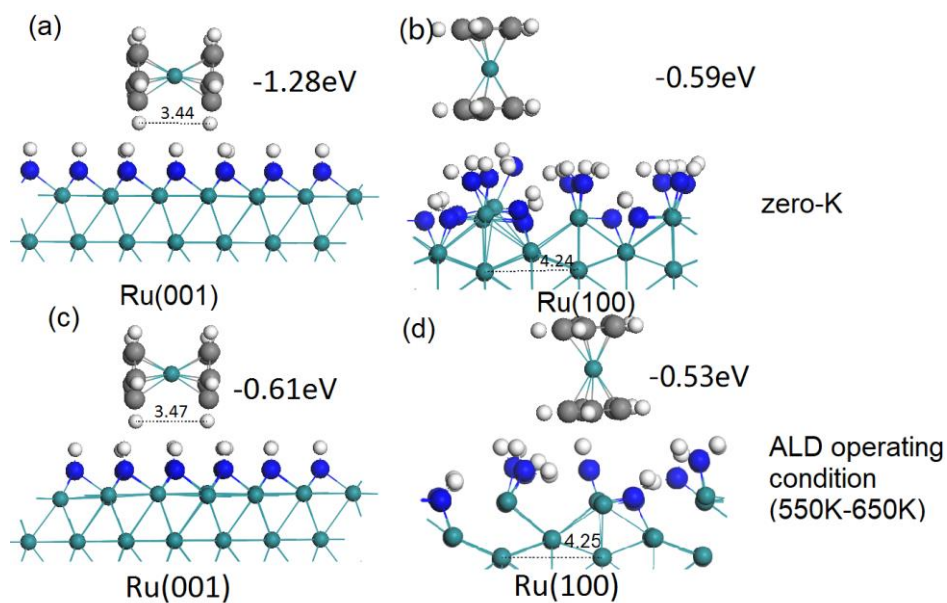

Figure S3. The configurations of the less stable adsorption mode of precursor  $\text{RuCp}_2$  on (a) Ru(001) surface, and (b) Ru(100) surface at zero-K and on (c) Ru(001) surface, and (d) Ru(100) surface at ALD operating condition. Ru atoms are represented by green colour. N atom and H atom are represented by dark blue and white atom, respectively.

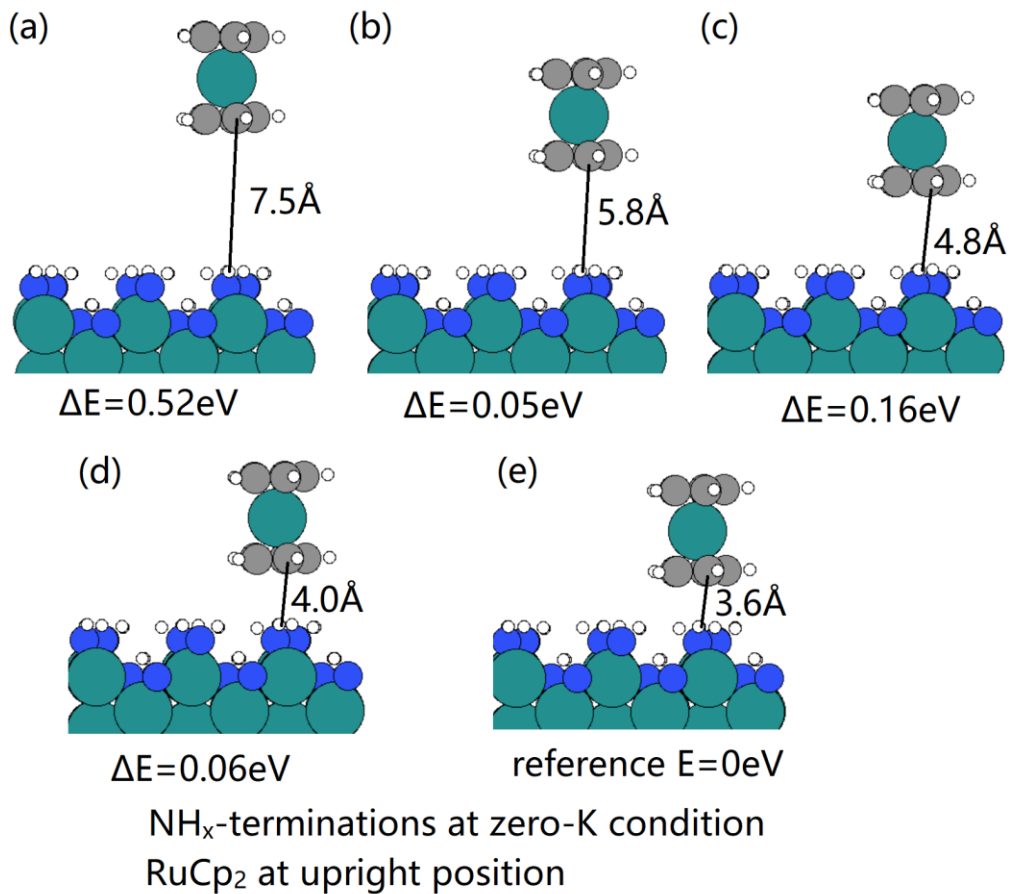

Figure S4. The computed energies for metal precursor RuCp<sub>2</sub> at upright position on Ru(100) surface with NH<sub>x</sub> terminations at zero-K condition.

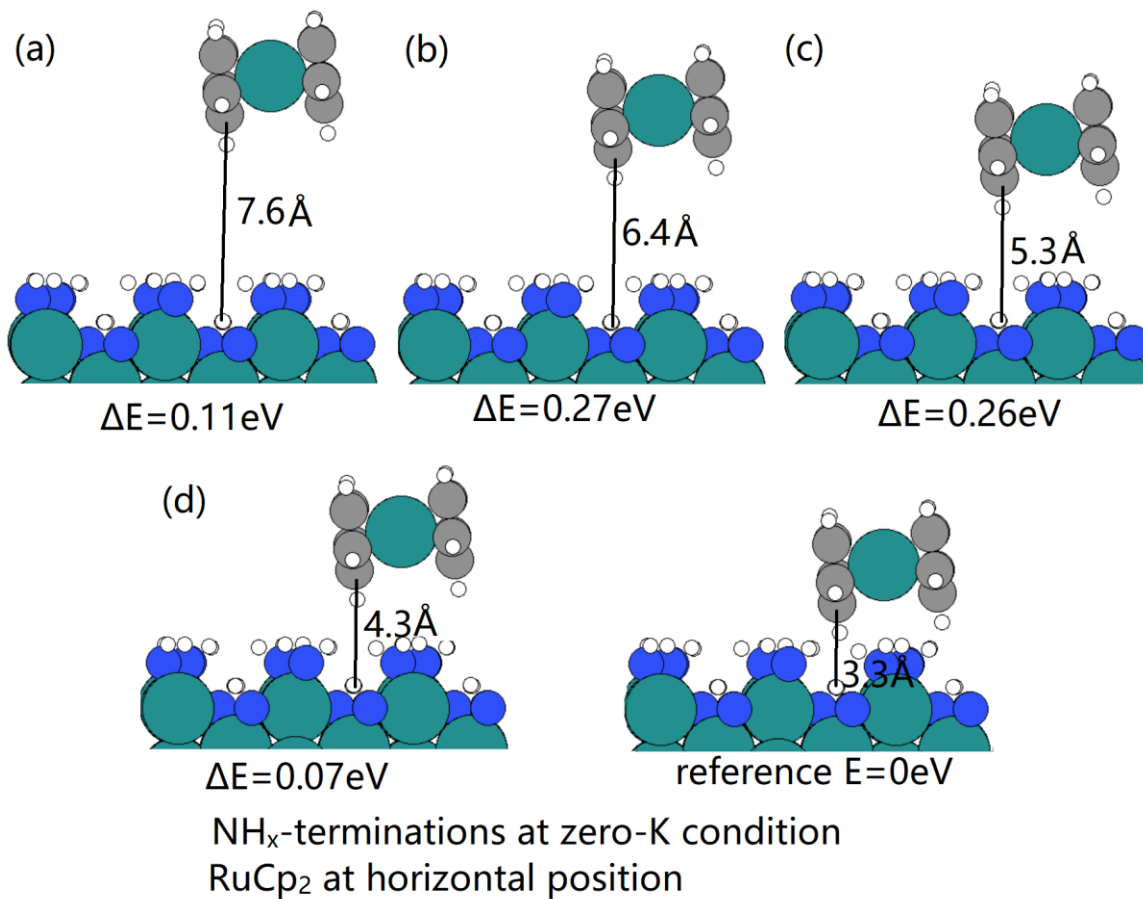

Figure S5. The computed energies for metal precursor RuCp<sub>2</sub> at horizontal position on Ru(100) surface with NH<sub>x</sub> terminations at zero-K condition.

The adsorption energy of precursor A at the metal surface is computed from

$$E_{ad} = E_{tot} - E_{\frac{NH_x}{Metal}} - E_A$$

where  $E_{tot}$ ,  $E_{NH_x/Metal}$ , and  $E_A$  are the energy of the  $NH_x$ -terminated metal slab with the precursor  $RuCp_2$  adsorbed, the slab model for the  $NH_x$ -terminated metal surface, and isolated precursor  $RuCp_2$ , respectively. A negative adsorption energy corresponds to exothermic adsorption. All the energies are computed with the van der Waals correction included. For the values of  $E_{NH_x/Metal}$ , we have performed the calculations with surface bounded  $RuCp_2$  removed to exclude any effect of surface  $NH_x$  rearrangement after the adsorption of  $RuCp_2$ .

Here,  $RuCp_2$  can be placed in **upright** position with only one Cp ring interacting with substrate and **horizontal** position with two Cp rings interacting with substrate. At each binding mode,  $RuCp_2$  is moved from far away from substrate  $NH_x$ -terminated Ru surface (C-H distance around 8Å) to close to substrate  $NH_x$ -terminated Ru surface (C-H distance around 3Å). The results are shown in Figure S4 (upright position) and Figure S5 (horizontal position). The energies are with reference to the structure with the lowest energy, which is the structure of surface bounded  $RuCp_2$  with shortest C-H distance. The adsorption energies are then computed with reference to the values of the two structure of surface bounded  $RuCp_2$  with shortest C-H distance, which are -0.59eV for upright position and -0.62eV for horizontal position.

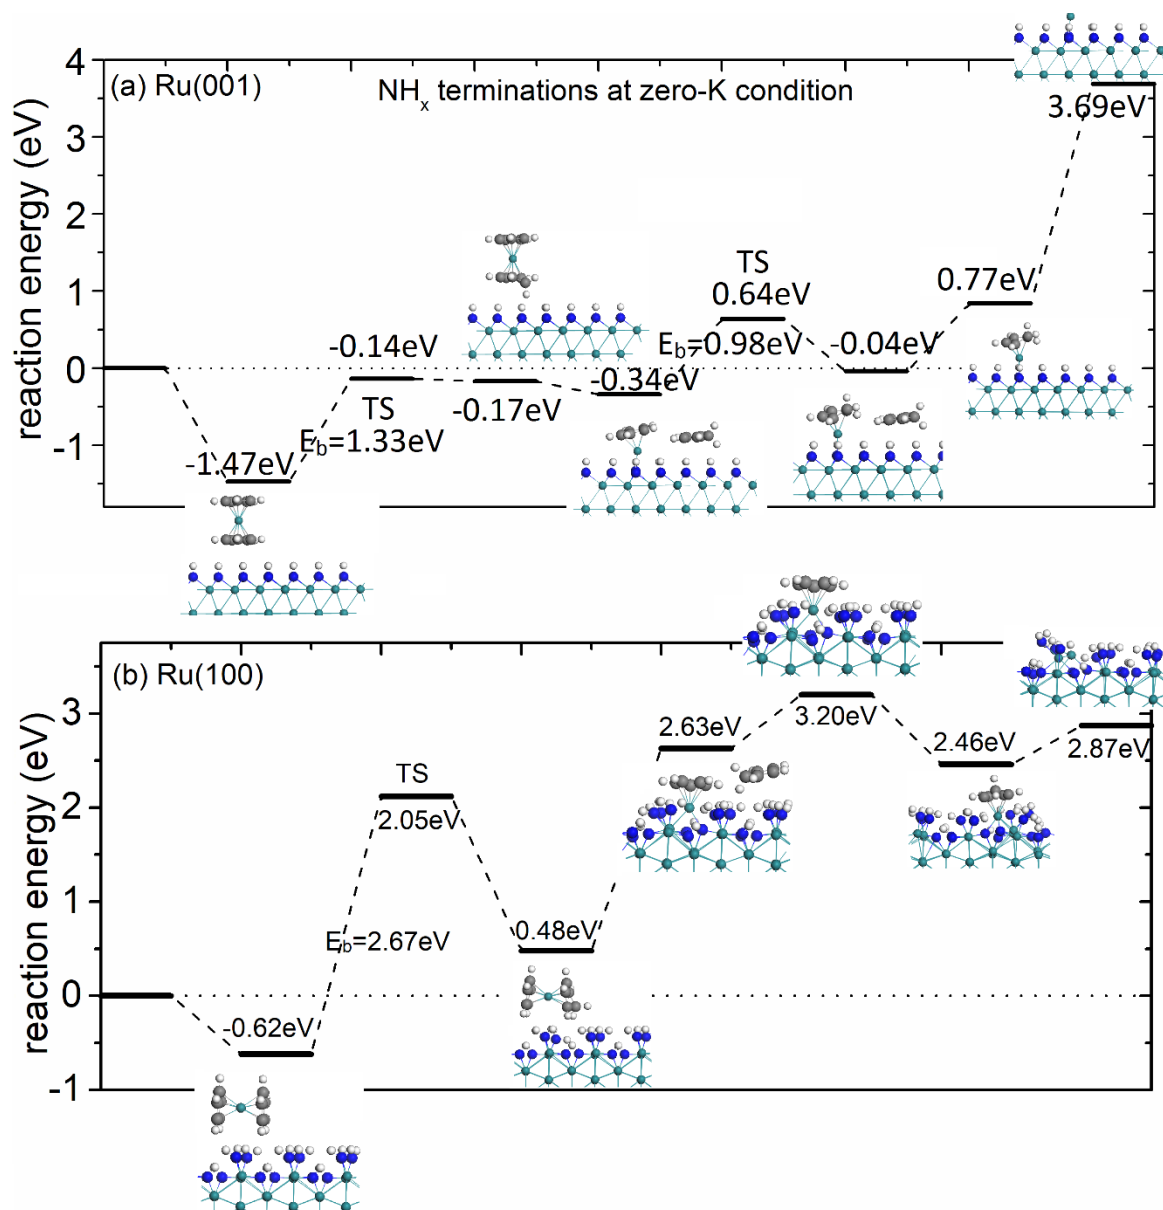

Figure S6. The plotted metal precursor reaction pathway on (a) Ru(001) surface and (b) Ru(100) surface with  $\text{NH}_x$  terminations at zero-K condition. The Cp ligand is eliminated via hydrogen transfer. The substrate Ru atoms are represented by green spheres. Carbon, nitrogen and hydrogen atoms are represented by grey, blue and white colour, respectively.



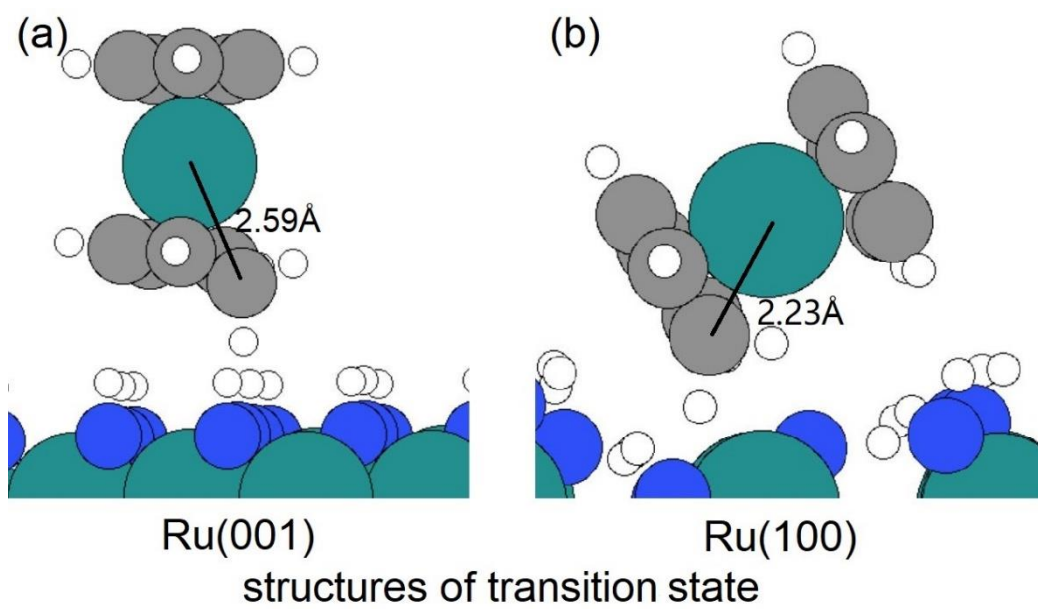

Figure S7. The structures of transition state for hydrogen transfer on  $\text{NH}_x$ -terminated (a) Ru(001) surface and (b) Ru(100) surface.
